# Supplementary material for: Environmental risks and agronomic benefits of industrial sewage sludge-derived biochar
Source: PeerJ. 2024 Sep 25;12:e18184. doi: 10.7717/peerj.18184 (PMC11648124; doi:10.7717/peerj.18184)
Supplement: Figure S1 [file peerj-12-18184-s003.xlsx]

## Sheet: List1
	control		SS		BC
	mean	SD	mean	SD	mean	SD
I.	88.3333	10.4083	98.3333	2.88675	91.6667	7.63763
II.	75	15	83.3333	5.7735	78.3333	7.63763
III.	86.6667	5.7735	80	5	88.3333	10.4083
