# Supplementary material for: Environmental risks and agronomic benefits of industrial sewage sludge-derived biochar
Source: PeerJ. 2024 Sep 25;12:e18184. doi: 10.7717/peerj.18184 (PMC11648124; doi:10.7717/peerj.18184)
Supplement: Figure S2 [file peerj-12-18184-s004.xlsx]

## Sheet: Fig.2A
	underground part		aboveground part
	mean (cm)	SD	mean (cm)	SD
control	6.27167	2.63853	5.7575	1.71389
SS	7.35333	0.21572	8.845	0.88378
BC	3.58167	0.31226	6.59333	0.73664

## Sheet: Fig. 2B
	underground part		aboveground part
	mean (cm)	SD	mean (cm)	SD
control	18.8333	6.25167	62	6.9282
SS	23.25	4.38035	83.3333	11.4273
BC	21.6667	1.25831	60.8333	6.78847
