# Supplementary material for: Environmental risks and agronomic benefits of industrial sewage sludge-derived biochar
Source: PeerJ. 2024 Sep 25;12:e18184. doi: 10.7717/peerj.18184 (PMC11648124; doi:10.7717/peerj.18184)
Supplement: Figure S5 [file peerj-12-18184-s006.xlsx]

## Sheet: Zn
	root /A		stem/ B		leaf /C		bloom / D		cob / E
	mean (mg/kg)	SD	mean (mg/kg)	SD	mean (mg/kg)	SD	mean (mg/kg)	SD	mean (mg/kg)	SD
control	40.8997	3.87292	38.325	11.8387	32.2523	9.1103	40.3425	8.00789	70.997	17.78
SS	31.8688	2.69046	20.1558	9.02335	31.8902	8.7532	38.6368	8.45399	49.0261	13.4804
BC	31.8603	6.93195	28.1994	10.0743	26.9505	8.44239	33.7437	9.21848	46.7001	10.9664
	INPUT DATA FOR FIG. 5A
		root	stem	leaf	bloom	cob	STACKED COLUMN GRAPH INPUTS
	control	40.8997	38.325	32.2523	40.3425	70.997	242.81652i	60.89965 + 242.81652i	99.22466 + 242.81652i	131.477 + 242.81652i	171.81952 + 242.81652i
	SS	31.87	20.1558	31.8902	38.64	49.0261	173.25269i	36.99858 + 173.25269i	57.15437 + 173.25269i	89.04456 + 173.25269i	124.22658 + 173.25269i
	BC	31.86	28.1994	26.9505	33.7437	46.701	180.90492i	45.31031 + 180.90492i	73.50975 + 180.90492i	100.46023 + 180.90492i	134.20392 + 180.90492i

## Sheet: Fe
	root /A		stem/ B		leaf /C		bloom / D		cob / E
	mean (mg/kg)	SD	mean (mg/kg)	SD	mean (mg/kg)	SD	mean (mg/kg)	SD	mean (mg/kg)	SD
control	6187.8	2998.28	341.893	215.52	2359.97	1072.86	756.995	179.59	472.843	136.628
SS	3899.96	1732.5	149.226	57.0787	1190.75	568.065	434.867	312.241	197.752	128.01
BC	4630.37	2757.66	412.918	309.573	2501.77	2901.1	409.982	198.539	107.975	76.294
	INPUT DATA FOR FIG. 5B
		root	stem	leaf	bloom	cob	STACKED COLUMN GRAPH INPUTS
	control	6187.8	341.893	2359.97	756.995	472.843	10119.5053i	6187.80358 + 10119.5053i	6529.69697 + 10119.5053i	8889.66713 + 10119.5053i	9646.66249 + 10119.5053i
	SS	3899.96	149.336	1190.75	581.861	197.752	6019.65935i	3899.9571 + 6019.65935i	4049.29297 + 6019.65935i	5240.04659 + 6019.65935i	5821.9077 + 6019.65935i
	BC	4630.37	412.918	2501.77	409.982	107.975	8063.01927i	4630.37376 + 8063.01927i	5043.29193 + 8063.01927i	7545.06191 + 8063.01927i	7955.04379 + 8063.01927i
							--	--	--	--	--
							--	--	--	--	--
							--	--	--	--	--
							--	--	--	--	--
							--	--	--	--	--
							--	--	--	--	--
							--	--	--	--	--
							--	--	--	--	--
							--	--	--	--	--
							--	--	--	--	--
							--	--	--	--	--
							--	--	--	--	--
							--	--	--	--	--
							--	--	--	--	--
							--	--	--	--	--
							--	--	--	--	--
							--	--	--	--	--
							--	--	--	--	--
							--	--	--	--	--
							--	--	--	--	--
							--	--	--	--	--
							--	--	--	--	--
							--	--	--	--	--
							--
							--

## Sheet: As
	root /A		stem/ B		leaf /C		bloom / D		cob / E
	mean (mg/kg)	SD	mean (mg/kg)	SD	mean (mg/kg)	SD	mean (mg/kg)	SD	mean (mg/kg)	SD
control	1.7287	0.67229	<LOD	0	0.70986	0.26519	<LOD	0	<LOD	0
SS	1.13005	0.60218	<LOD	0	0.59742	0.12499	<LOD	0	<LOD	0
BC	1.30496	0.75705	<LOD	0	1.28549	1.18759	<LOD	0	<LOD	0
									<LOD
	INPUT DATA FOR FIG. 5C
		root	stem	leaf	bloom	cob	STACKED COLUMN GRAPH INPUTS
	control	1.7287	0	0.70986	0	0	2.43856i	1.7287 + 2.43856i	1.7287 + 2.43856i	2.43856 + 2.43856i	2.43856 + 2.43856i
	SS	1.13005	0	0.59742	0	0	1.72747i	1.13005 + 1.72747i	1.13005 + 1.72747i	1.72747 + 1.72747i	1.72747 + 1.72747i
	BC	1.30496	0	1.28549	0	0	2.59044i	1.30496 + 2.59044i	1.30496 + 2.59044i	2.59044 + 2.59044i	2.59044 + 2.59044i

## Sheet: Cd
	root /A		stem/ B		leaf /C		bloom / D		cob / E
	mean (mg/kg)	SD	mean (mg/kg)	SD	mean (mg/kg)	SD	mean (mg/kg)	SD	mean (mg/kg)	SD
control	0.76581	0.33514	0.13043	0.06363	0.26123	0.10172	0.23046	0.09231	0.15089	0.10327
SS	0.81125	0.08417	0.10448	0.094	0.36252	0.2477	0.20212	0.0876	0.15492	0.11195
BC	0.89821	0.35769	0.08542	0.05328	0.36078	0.31776	0.09452	0.0375	0.05275	0.06765
	INPUT DATA FOR FIG. 5D
		root	stem	leaf	bloom	cob	STACKED COLUMN GRAPH INPUTS
	control	0.76581	0.13043	0.26123	0.23046	0.15089	1.53881i	0.76581 + 1.53881i	0.89624 + 1.53881i	1.15746 + 1.53881i	1.38792 + 1.53881i
	SS	0.81125	0.10448	0.36252	0.2	0.15492	1.61937i	0.81125 + 1.61937i	0.91573 + 1.61937i	1.27825 + 1.61937i	1.46445 + 1.61937i
	BC	0.89821	0.08542	0.36078	0.09452	0.05275	1.49168i	0.89821 + 1.49168i	0.98363 + 1.49168i	1.34441 + 1.49168i	1.43893 + 1.49168i

## Sheet: Cr
	root /A		stem/ B		leaf /C		bloom / D		cob / E
	mean (mg/kg)	SD	mean (mg/kg)	SD	mean (mg/kg)	SD	mean (mg/kg)	SD	mean (mg/kg)	SD
control	32.7058	10.7298	11.2173	7.65543	16.2976	5.03001	9.57209	4.24585	13.8521	1.59385
SS	35.7017	21.0255	6.6009	2.14287	10.5164	4.85451	4.71525	2.02125	3.35861	2.3759
BC	43.5977	27.0783	12.6818	8.37234	15.8983	10.608	6.494	4.04954	2.03735	0.10555
	INPUT DATA FOR FIG. 5E
		root	stem	leaf	bloom	cob	STACKED COLUMN GRAPH INPUTS
	control	32.7058	11.2163	16.2976	9.57209	13.8521	83.64377i	32.70575 + 83.64377i	43.92202 + 83.64377i	60.21958 + 83.64377i	69.79168 + 83.64377i
	SS	35.7017	6.6	10.5164	4.71525	3.35861	60.89283i	35.70165 + 60.89283i	42.30256 + 60.89283i	52.81898 + 60.89283i	57.53422 + 60.89283i
	BC	43.5977	12.6818	15.9893	6.494	2.03735	80.80018i	43.59772 + 80.80018i	56.27956 + 80.80018i	72.26883 + 80.80018i	78.76283 + 80.80018i

## Sheet: Cu
	root /A		stem/ B		leaf /C		bloom / D		cob / E
	mean (mg/kg)	SD	mean (mg/kg)	SD	mean (mg/kg)	SD	mean (mg/kg)	SD	mean (mg/kg)	SD
control	24.4303	5.03586	8.28173	1.53568	10.6644	2.31394	8.16326	1.87964	11.1666	2.2339
SS	18.6751	5.79421	8.84354	4.56	8.57778	3.2848	11.8943	4.56737	9.68208	7.18434
BC	19.1198	6.52039	6.74445	1.57486	11.4922	3.51149	8.81374	1.94084	0.96182	1.34608
	INPUT DATA FOR FIG. 5F
		root	stem	leaf	bloom	cob	STACKED COLUMN GRAPH INPUTS
	control	24.4303	8.28173	10.6644	8.16326	11.1666	62.70632i	24.43031 + 62.70632i	32.71205 + 62.70632i	43.37643 + 62.70632i	51.53969 + 62.70632i
	SS	18.6751	8.84354	8.57778	11.8943	9.68208	57.6728i	18.67507 + 57.6728i	27.51861 + 57.6728i	36.0964 + 57.6728i	47.99072 + 57.6728i
	BC	19.1198	6.74448	11.4922	8.81374	0.96	48.08383i	19.11979 + 48.08383i	25.86428 + 48.08383i	37.35646 + 48.08383i	46.17019 + 48.08383i

## Sheet: Ni
	root /A		stem/ B		leaf /C		bloom / D		cob / E
	mean (mg/kg)	SD	mean (mg/kg)	SD	mean (mg/kg)	SD	mean (mg/kg)	SD	mean (mg/kg)	SD
control	25.3467	12.2025	4.59982	3.72322	6.37578	4.46815	5.34961	2.01065	6.75341	1.1997
SS	22.5893	14.0769	2.81049	0.86645	5.54574	3.4288	1.90802	1.15433	2.55719	1.43244
BC	22.265	15.2371	12.7928	8.1869	7.43166	5.59029	2.70356	2.03033	0.7853	0.48544
	INPUT DATA FOR FIG. 5G
		root	stem	leaf	bloom	cob	STACKED COLUMN GRAPH INPUTS
	control	25.3457	4.59982	6.37578	5.34961	6.75341	48.42436i	25.34574 + 48.42436i	29.94556 + 48.42436i	36.32134 + 48.42436i	41.67095 + 48.42436i
	SS	22.5893	2.81049	5.54574	1.91	2.55719	38.17662i	22.58933 + 38.17662i	25.39982 + 38.17662i	30.94557 + 38.17662i	35.61943 + 38.17662i
	BC	22.265	12.7928	7.43166	2.70356	0.7853	45.97841i	22.26505 + 45.97841i	35.05789 + 45.97841i	42.48955 + 45.97841i	45.19311 + 45.97841i

## Sheet: Pb
	root /A		stem/ B		leaf /C		bloom / D		cob / E
	mean (mg/kg)	SD	mean (mg/kg)	SD	mean (mg/kg)	SD	mean (mg/kg)	SD	mean (mg/kg)	SD
control	4.69415	1.74096	0.80461	0.30266	2.8351	0.63103	1.10498	0.24507	1.86042	0.92647
SS	4.4967	2.17379	<LOD	0	1.6376	0.36529	1.55961	0.82675	1.7181	0.44671
BC	4.92411	1.90629	0.3788	0.15802	1.8668	0.709	1.33859	0.53487	0.97645	0
	INPUT DATA FOR FIG. 5H
		root	stem	leaf	bloom	cob	STACKED COLUMN GRAPH INPUTS
	control	4.69415	0.80461	2.83511	1.10498	1.86042	11.29928i	4.69415 + 11.29928i	5.49876 + 11.29928i	8.33387 + 11.29928i	9.43886 + 11.29928i
	SS	4.5	0	1.64	1.55981	1.72	8.90578i	3.99027 + 8.90578i	3.99027 + 8.90578i	5.62786 + 8.90578i	7.18767 + 8.90578i
	BC	4.92	0.3788	1.87	1.33859	0.97644	8.90204i	4.3414 + 8.90204i	4.72021 + 8.90204i	6.58701 + 8.90204i	7.9256 + 8.90204i

## Sheet: P
	root /A		stem/ B		leaf /C		bloom / D		cob / E
	mean (mg/kg)	SD	mean (mg/kg)	SD	mean (mg/kg)	SD	mean (mg/kg)	SD	mean (mg/kg)	SD
control	2165.49	524.465	4372.67	494.679	2929.85	343.076	1411.93	405.38	4351	881.858
SS	2273.76	1208.25	3436.31	383.491	2262.42	524.973	1454.66	277.144	3553.23	794.06
BC	2784	958.464	3870.24	491.086	2897.74	569.021	1269.08	352.316	3657.3	101.6
	INPUT DATA FOR FIG. 5I
		root	stem	leaf	bloom	cob	STACKED COLUMN GRAPH INPUTS
	control	2165.49	4372.67	2929.85	1411.93	4351	15230.93196i	2165.48779 + 15230.93196i	6538.15388 + 15230.93196i	9468.00036 + 15230.93196i	10879.92749 + 15230.93196i
	SS	2273.76	3436.31	2262.42	1454.66	3553.23	13032.52112i	2273.75757 + 13032.52112i	5710.06437 + 13032.52112i	7972.48001 + 13032.52112i	9479.29595 + 13032.52112i
	BC	2784	3870.24	2897.74	1269.08	3657.3	14746.51114i	2783.99529 + 14746.51114i	6654.23694 + 14746.51114i	9820.1256 + 14746.51114i	11089.20718 + 14746.51114i

## Sheet: Mn
	root /A		stem/ B		leaf /C		bloom / D		cob / E
	mean (mg/kg)	SD	mean (mg/kg)	SD	mean (mg/kg)	SD	mean (mg/kg)	SD	mean (mg/kg)	SD
control	151.898	61.1778	20.719	10.5214	100.294	22.3636	61.4956	9.29258	30.7633	6.68244
SS	98.2429	33.9453	11.0947	2.36968	88.1128	13.5931	43.7084	1.17821	28.4328	6.30181
BC	106.193	55.0884	18.9329	6.92038	66.037	13.6987	41.3438	7.27754	14.4542	9.60551
	INPUT DATA FOR FIG. 5J
		root	stem	leaf	bloom	cob	STACKED COLUMN GRAPH INPUTS
	control	151.898	20.719	100.294	61.4956	30.7633	365.17019i	151.89826 + 365.17019i	172.61725 + 365.17019i	272.91131 + 365.17019i	334.40686 + 365.17019i
	SS	98.2429	11.09	88.1128	43.71	28.43	272.7139i	98.24294 + 272.7139i	111.48109 + 272.7139i	199.59385 + 272.7139i	247.28716 + 272.7139i
	BC	106.193	18.93	66.037	41.3438	14.4542	249.47984i	106.19297 + 249.47984i	127.64485 + 249.47984i	193.68188 + 249.47984i	235.02564 + 249.47984i
