# Supplementary material for: Environmental risks and agronomic benefits of industrial sewage sludge-derived biochar
Source: PeerJ. 2024 Sep 25;12:e18184. doi: 10.7717/peerj.18184 (PMC11648124; doi:10.7717/peerj.18184)
Supplement: Supplemental Information 5 [file peerj-12-18184-s005.xlsx]

## Sheet: Biomass
							Dilution on c=50 ng/μl (V=20 μl)
sample	amendment	c (ng/μl)	m (g)	"c" in 60 μl (ng/60μl)	"c" in 60 μl (μg/60μl)	μg DNA/1 g of soil	DNA	H2O
1	control	236.4	0.272	14184	14.184	52.1471	4.23012	15.7699	Summary Statistics				ANOVA Table
2	control	218.9	0.273	13134	13.134	48.1099	4.5683	15.4317		Average	Standard deviation		Source	Sum of Squares	Df	Mean Square	F-Ratio	P-Value
3	control	219.2	0.264	13152	13.152	49.8182	4.56204	15.438	Control	50.025	2.02652		Between groups	71.1363	2	35.5682	3.35	0.1053
4	BC	204.9	0.27	12294	12.294	45.5333	4.88043	15.1196	Biochar	43.3404	2.21303		Within groups	63.6371	6	10.6062
5	BC	184.3	0.269	11058	11.058	41.1078	5.42594	14.5741	Sludge	48.1164	4.77643		Total (Corr.)	134.773	8
6	BC	226.3	0.313	13578	13.578	43.3802	4.41891	15.5811
7	SS	199.1	0.261	11946	11.946	45.7701	5.0226	14.9774	Multiple Range Tests
8	SS	203.1	0.271	12186	12.186	44.9668	4.92368	15.0763	Method: 95.0 percent LSD
9	SS	235	0.263	14100	14.1	53.6122	4.25532	15.7447		Count	Mean	Homogeneous Groups
									Biochar	3	43.3404	X	a
									Sludge	3	48.1164	XX	ab
									Control	3	50.025	X	b
													μg DNA/1 g pôdy	SD
												control	50.025	2.02652
												BC	43.3404	2.21303
												SS	48.1164	4.77643

## Sheet: B-ARISA_Height30
Control		Control		Control		Biochar		Biochar		Biochar		Sludge		Sludge		Sludge				control	BC	SS
1B	height	2B	height	3B	height	4B	height	5B	height	6B	height	7B	height	8B	height	9B	height			212	233	211
212	41	233	73	233	49	251	44	251	36	233	42	251	32	251	47	211	30			233	251	224
233	100	250	84	250	58	263	47	263	39	251	72	263	114	264	128	224	55			240	263	229
240	30	263	115	263	78	296	35	280	32	263	74	275	46	275	86	229	38			250	280	232
250	138	280	31	296	42	304	97	294	63	296	45	305	78	305	109	232	52			258	294	250
258	33	285	35	304	118	435	30	304	99	304	150	385	376	315	34	250	95			262	296	251
262	48	296	70	334	31	478	52	334	41	315	34	478	33	385	554	261	38			263	304	261
263	170	304	156	435	37			459	37	334	32	580	41	429	30	263	218			264	315	263
264	36	311	58	457	173			478	41	430	33	721	31	581	51	274	144			274	334	264
274	33	315	34	478	57					434	46					280	35			280	430	274
280	48	334	42	655	40					478	71					285	38			285	434	275
285	49	339	31	838	34					656	35					287	35			290	435	280
290	30	364	35	894	45											296	78			294	459	285
294	37	430	32													304	232			296	478	287
296	103	435	51													315	50			304	656	296
304	258	459	63													324	35			307		304
307	51	478	50													335	50			311		305
315	58	542	32													339	35			315		315
325	56	545	36													364	48			325		324
334	72	592	49													367	47			334		335
339	42	621	36													376	42			339		339
364	51	656	60													385	1070			364		364
376	33	693	45													410	39			376		367
389	31	718	41													418	30			389		376
390	31	839	39													430	81			390		385
410	34	895	52													435	56			410		410
430	57															436	66			430		418
435	75															455	125			435		429
457	34															471	37			457		430
471	32															478	106			459		435
478	112															533	36			471		436
529	36															543	52			478		455
543	39															546	55			529		471
546	53															576	63			542		478
570	43															583	136			543		533
575	30															591	32			545		543
588	32															599	57			546		546
591	31															604	31			570		576
617	36															618	36			575		580
623	49															646	30			588		581
636	37															659	67			591		583
643	43															665	41			592		591
658	79															683	51			617		599
682	33															687	35			621		604
696	41															697	50			623		618
721	52															699	45			636		646
726	35															722	51			643		659
728	33															728	42			655		665
844	63															756	60			656		683
877	43															847	38			658		687
891	32															849	43			682		697
901	79															903	34			693		699
																				696		721
																				718		722
																				721		728
																				726		756
																				728		847
																				838		849
																				839		903
																				844
																				877
																				891
																				894
																				895
																				901

## Sheet: B-ARISA_evaluation
	Control	Control	Control	Biochar	Biochar	Biochar	Sludge	Sludge	Sludge
	1B	2B	3B	4B	5B	6B	7B	8B	9B					Control	Control	Control	Biochar	Biochar	Biochar	Sludge	Sludge	Sludge		Simpson
211	0	0	0	0	0	0	0	0	30	30				1B	2B	3B	4B	5B	6B	7B	8B	9B		Summary Statistics						Method: 95.0 percent LSD
212	41	0	0	0	0	0	0	0	0	41			Taxa_S	51	25	12	6	8	11	8	8	51			Count	Average	Standard deviation		P-value		Count	Mean	Homogeneous Groups
224	0	0	0	0	0	0	0	0	55	55			Individuals	2842	1350	762	305	388	634	751	1039	4090		control	3	0.934067	0.0453092		0.118	SS	3	0.764933	X	a
229	0	0	0	0	0	0	0	0	38	38			Dominance_D	0.02987	0.05111	0.1168	0.1976	0.1484	0.1209	0.2967	0.3237	0.08475		BC	3	0.844367	0.0388582			BC	3	0.844367	XX	ab
232	0	0	0	0	0	0	0	0	52	52			Simpson_1-D	0.9701	0.9489	0.8832	0.8024	0.8516	0.8791	0.7033	0.6763	0.9152		SS	3	0.764933	0.130833			control	3	0.934067	X	b
233	100	73	49	0	0	42	0	0	0	264			Shannon_H	3.751	3.107	2.323	1.71	2	2.263	1.601	1.538	3.331
240	30	0	0	0	0	0	0	0	0	30			Evenness_e^H/S	0.8347	0.8945	0.8502	0.9215	0.9237	0.874	0.6197	0.5821	0.5483		Shannon
250	138	84	58	0	0	0	0	0	95	375			Brillouin	3.702	3.058	2.282	1.666	1.952	2.22	1.575	1.519	3.296		Summary Statistics						Method: 95.0 percent LSD
251	0	0	0	44	36	72	32	47	0	231			Menhinick	0.9567	0.6804	0.4347	0.3436	0.4061	0.4369	0.2919	0.2482	0.7975			Count	Average	Standard deviation		P-value		Count	Mean	Homogeneous Groups
258	33	0	0	0	0	0	0	0	0	33			Margalef	6.288	3.33	1.658	0.8741	1.174	1.55	1.057	1.008	6.012		control	3	3.06033	0.715143		0.2386	BC	3	1.991	X	a
261	0	0	0	0	0	0	0	0	38	38			Equitability_J	0.954	0.9654	0.9347	0.9544	0.9618	0.9439	0.7699	0.7398	0.8471		BC	3	1.991	0.27661			SS	3	2.15667	X	a
262	48	0	0	0	0	0	0	0	0	48			Fisher_alpha	8.827	4.356	2.022	1.059	1.426	1.891	1.25	1.18	8.208		SS	3	2.15667	1.01749			control	3	3.06033	X	a
263	170	115	78	47	39	74	114	0	218	855			Berger-Parker	0.09078	0.1156	0.227	0.318	0.2552	0.2366	0.5007	0.5332	0.2616
264	36	0	0	0	0	0	0	128	0	164			Chao-1	51	25	12	6	8	11	8	8	51		Evenness
274	33	0	0	0	0	0	0	0	144	177														Summary Statistics						Method: 95.0 percent LSD
275	0	0	0	0	0	0	46	86	0	132						Simpson_1-D	Shannon_H	Evenness_e^H/S	Chao-1						Count	Average	Standard deviation		P-value		Count	Mean	Homogeneous Groups
280	48	31	0	0	32	0	0	0	35	146				control	1B	0.9701	3.751	0.8347	51					control	3	0.8598	0.0310343		0	SS	3	0.583367	X	a
285	49	35	0	0	0	0	0	0	38	122				control	2B	0.9489	3.107	0.8945	25					BC	3	0.9064	0.0280808			control	3	0.8598	X	b
287	0	0	0	0	0	0	0	0	35	35				control	3B	0.8832	2.323	0.8502	12					SS	3	0.583367	0.0357168			BC	3	0.9064	X	b
290	30	0	0	0	0	0	0	0	0	30				BC	4B	0.8024	1.71	0.9215	6
294	37	0	0	0	63	0	0	0	0	100				BC	5B	0.8516	2	0.9237	8					Chao-1
296	103	70	42	35	0	45	0	0	78	373				BC	6B	0.8791	2.263	0.874	11					Summary Statistics						Method: 95.0 percent LSD
304	258	156	118	97	99	150	0	0	232	1110				SS	7B	0.7033	1.601	0.6197	8						Count	Average	Standard deviation		P-value		Count	Mean	Homogeneous Groups
305	0	0	0	0	0	0	78	109	0	187				SS	8B	0.6763	1.538	0.5821	8					control	3	29.3333	19.8578		0.4182	BC	3	8.33333	X	a
307	51	0	0	0	0	0	0	0	0	51				SS	9B	0.9152	3.331	0.5483	51					BC	3	8.33333	2.51661			SS	3	22.3333	X	a
311	0	58	0	0	0	0	0	0	0	58														SS	3	22.3333	24.8261			control	3	29.3333	X	a
315	58	34	0	0	0	34	0	34	50	210
324	0	0	0	0	0	0	0	0	35	35
325	56	0	0	0	0	0	0	0	0	56
334	72	42	31	0	41	32	0	0	0	218
335	0	0	0	0	0	0	0	0	50	50
339	42	31	0	0	0	0	0	0	35	108
364	51	35	0	0	0	0	0	0	48	134
367	0	0	0	0	0	0	0	0	47	47
376	33	0	0	0	0	0	0	0	42	75
385	0	0	0	0	0	0	376	554	1070	2000
389	31	0	0	0	0	0	0	0	0	31
390	31	0	0	0	0	0	0	0	0	31
410	34	0	0	0	0	0	0	0	39	73
418	0	0	0	0	0	0	0	0	30	30
429	0	0	0	0	0	0	0	30	0	30
430	57	32	0	0	0	33	0	0	81	203
434	0	0	0	0	0	46	0	0	0	46
435	75	51	37	30	0	0	0	0	56	249
436	0	0	0	0	0	0	0	0	66	66
455	0	0	0	0	0	0	0	0	125	125
457	34	0	173	0	0	0	0	0	0	207
459	0	63	0	0	37	0	0	0	0	100
471	32	0	0	0	0	0	0	0	37	69
478	112	50	57	52	41	71	33	0	106	522
529	36	0	0	0	0	0	0	0	0	36
533	0	0	0	0	0	0	0	0	36	36
542	0	32	0	0	0	0	0	0	0	32
543	39	0	0	0	0	0	0	0	52	91
545	0	36	0	0	0	0	0	0	0	36
546	53	0	0	0	0	0	0	0	55	108
570	43	0	0	0	0	0	0	0	0	43
575	30	0	0	0	0	0	0	0	0	30
576	0	0	0	0	0	0	0	0	63	63
580	0	0	0	0	0	0	41	0	0	41					211	212	224	229	232	233	240	250	251	258	261	262	263	264	274	275	280	285	287	290	294	296	304	305	307	311	315	324	325	334	335	339	364	367	376
581	0	0	0	0	0	0	0	51	0	51		1	Control	1B	0	41	0	0	0	100	30	138	0	33	0	48	170	36	33	0	48	49	0	30	37	103	258	0	51	0	58	0	56	72	0	42	51	0	33
583	0	0	0	0	0	0	0	0	136	136		1	Control	2B	0	0	0	0	0	73	0	84	0	0	0	0	115	0	0	0	31	35	0	0	0	70	156	0	0	58	34	0	0	42	0	31	35	0	0
588	32	0	0	0	0	0	0	0	0	32		1	Control	3B	0	0	0	0	0	49	0	58	0	0	0	0	78	0	0	0	0	0	0	0	0	42	118	0	0	0	0	0	0	31	0	0	0	0	0
591	31	0	0	0	0	0	0	0	32	63		2	Biochar	4B	0	0	0	0	0	0	0	0	44	0	0	0	47	0	0	0	0	0	0	0	0	35	97	0	0	0	0	0	0	0	0	0	0	0	0
592	0	49	0	0	0	0	0	0	0	49		2	Biochar	5B	0	0	0	0	0	0	0	0	36	0	0	0	39	0	0	0	32	0	0	0	63	0	99	0	0	0	0	0	0	41	0	0	0	0	0
599	0	0	0	0	0	0	0	0	57	57		2	Biochar	6B	0	0	0	0	0	42	0	0	72	0	0	0	74	0	0	0	0	0	0	0	0	45	150	0	0	0	34	0	0	32	0	0	0	0	0
604	0	0	0	0	0	0	0	0	31	31		3	Sludge	7B	0	0	0	0	0	0	0	0	32	0	0	0	114	0	0	46	0	0	0	0	0	0	0	78	0	0	0	0	0	0	0	0	0	0	0
617	36	0	0	0	0	0	0	0	0	36		3	Sludge	8B	0	0	0	0	0	0	0	0	47	0	0	0	0	128	0	86	0	0	0	0	0	0	0	109	0	0	34	0	0	0	0	0	0	0	0
618	0	0	0	0	0	0	0	0	36	36		3	Sludge	9B	30	0	55	38	52	0	0	95	0	0	38	0	218	0	144	0	35	38	35	0	0	78	232	0	0	0	50	35	0	0	50	35	48	47	42
621	0	36	0	0	0	0	0	0	0	36
623	49	0	0	0	0	0	0	0	0	49				Variance-covariance matrix, Within grouping
636	37	0	0	0	0	0	0	0	0	37				PC	Eigenvalue	% variance			PC 1	PC 2	PC 3	PC 4	PC 5	Group	PC 6	PC 7	PC 8
643	43	0	0	0	0	0	0	0	0	43				1	54443.9	74.151		Kontrola	-0.23767	3.6826	-0.29748	-1.0141	-0.49393	1	0.60844	2568500000000000	-2275300000000000
646	0	0	0	0	0	0	0	0	30	30				2	9388.65	12.787		Kontrola	-0.65708	0.86299	2.5018	-0.86359	-0.61625	1	0.60457	2568500000000000	-2275300000000000
655	0	0	40	0	0	0	0	0	0	40				3	4237.4	5.7712		Kontrola	-0.83359	0.032936	-1.1599	-2.1697	-0.88929	1	0.90693	2568500000000000	-2275300000000000
656	0	60	0	0	0	35	0	0	0	95				4	3659.97	4.9848		Biouhlie	-0.92338	0.19911	0.3294	-1.0528	-0.11117	2	-1.3934	589950000000000	-2363400000000000
658	79	0	0	0	0	0	0	0	0	79				5	1191.47	1.6227		Biouhlie	-0.9483	0.2128	0.40977	-0.82649	1.6635	2	2.1832	589950000000000	-2363400000000000
659	0	0	0	0	0	0	0	0	67	67				6	501.728	0.68334		Biouhlie	-0.80466	0.61598	0.6787	-1.0921	-2.2866	2	1.9166	589950000000000	-2363400000000000
665	0	0	0	0	0	0	0	0	41	41				7	2.52701e-28	3.4417e-31		Kal	0.13062	-1.2536	-0.30324	0.64515	1.0744	3	-1.6058	-3158400000000000	4638700000000000
682	33	0	0	0	0	0	0	0	0	33				8	1.29209e-28	1.7598e-31		Kal	0.5375	-2.186	-1.3974	4.3337	0.67167	3	-1.6084	-3158400000000000	4638700000000000
683	0	0	0	0	0	0	0	0	51	51								Kal	3.7366	-2.1668	-0.76164	2.04	0.98771	3	-1.6122	-3158400000000000	4638700000000000
687	0	0	0	0	0	0	0	0	35	35
693	0	45	0	0	0	0	0	0	0	45							control	-0.23767
696	41	0	0	0	0	0	0	0	0	41							control	-0.65708
697	0	0	0	0	0	0	0	0	50	50							control	-0.83359
699	0	0	0	0	0	0	0	0	45	45							control	3.6826
718	0	41	0	0	0	0	0	0	0	41							control	0.86299
721	52	0	0	0	0	0	31	0	0	83							control	0.032936
722	0	0	0	0	0	0	0	0	51	51							control	-0.29748
726	35	0	0	0	0	0	0	0	0	35							control	2.5018
728	33	0	0	0	0	0	0	0	42	75							control	-1.1599
756	0	0	0	0	0	0	0	0	60	60							control	-1.0141
838	0	0	34	0	0	0	0	0	0	34							control	-0.86359
839	0	39	0	0	0	0	0	0	0	39							control	-2.1697
844	63	0	0	0	0	0	0	0	0	63							control	-0.49393
847	0	0	0	0	0	0	0	0	38	38							control	-0.61625
849	0	0	0	0	0	0	0	0	43	43							control	-0.88929
877	43	0	0	0	0	0	0	0	0	43							BC	-0.92338
891	32	0	0	0	0	0	0	0	0	32							BC	-0.9483
894	0	0	45	0	0	0	0	0	0	45							BC	-0.80466
895	0	52	0	0	0	0	0	0	0	52							BC	0.19911
901	79	0	0	0	0	0	0	0	0	79							BC	0.2128
903	0	0	0	0	0	0	0	0	34	34							BC	0.61598
	2842	1350	762	305	388	634	751	1039	4090								BC	0.3294
	2842	1350	762	305	388	634	751	1039	4090								BC	0.40977
																	BC	0.6787
																	BC	-1.0528
																	BC	-0.82649
																	BC	-1.0921
																	BC	-0.11117
																	BC	1.6635
																	BC	-2.2866
																	SS	0.13062
																	SS	0.5375
																	SS	3.7366
																	SS	-1.2536
																	SS	-2.186
																	SS	-2.1668
																	SS	-0.30324
																	SS	-1.3974
																	SS	-0.76164
																	SS	0.64515
																	SS	4.3337
																	SS	2.04
																	SS	1.0744
																	SS	0.67167
																	SS	0.98771
[truncated: 69 more columns]

## Sheet: F-ARISA_Height30
Control		Control		Control		Biochar		Biochar		Biochar		Sludge		Sludge		Sludge					control	BC	SS
1F	height	2F	height	3F	height	4F	height	5F	height	6F	height	7F	height	8F	height	9F	height				226	388	388
422	34	450	32	226	34	388	84	388	48	495	77	495	51	388	30	422	180				388	418	422
436	43	495	38	388	34	434	49	418	43	519	81	518	113	437	54	494	56				422	434	437
495	96	525	106	423	84	437	82	437	58	525	207	525	206	494	101	517	453				423	437	494
520	123	542	49	437	45	458	55	439	57	529	70	542	420	518	112	524	227				436	439	495
526	202	607	129	495	142	485	38	458	51	542	88	598	92	525	350	537	47				437	458	517
538	40	638	179	518	171	495	308	495	226	549	49	605	160	542	291	541	351				450	485	518
543	77	686	92	520	108	518	458	518	195	579	40	622	484	550	48	548	53				495	495	524
551	73			525	462	525	1066	520	97	588	31	636	445	555	112	554	45				518	518	525
567	55			529	31	534	72	525	922	604	236	683	64	578	43	596	86				520	519	537
583	69			534	39	538	201	530	44	606	57	924	149	580	38	602	190				525	520	541
607	233			538	62	541	509	534	38	619	80			597	584	605	55				526	525	542
624	30			542	174	545	67	538	32	634	451			604	320	619	459				529	529	548
638	536			547	67	546	204	542	453	659	31			607	113	632	775				534	530	550
665	58			549	86	550	167	550	163	672	39			620	1351	640	113				538	534	554
686	141			555	45	555	109	552	69	680	103			634	680	658	33				542	538	555
				565	49	560	47	556	81	691	36			642	83	679	63				543	541	578
				580	75	565	89	565	140					660	76	954	115				547	542	580
				600	57	577	89	578	78					666	34						549	545	596
				604	490	579	158	580	113					681	88						551	546	597
				607	165	591	48	601	60					959	51						555	549	598
				619	170	600	132	604	990												565	550	602
				634	921	603	1264	607	380												567	552	604
				653	30	606	535	614	40												580	555	605
				660	106	612	76	619	172												583	556	607
				666	47	619	415	635	1128												600	560	619
				673	42	633	1689	642	41												604	565	620
				681	224	641	59	647	89												607	577	622
				924	34	644	50	660	79												619	578	632
				960	40	659	90	666	91												624	579	634
				975	32	664	82	676	50												634	580	636
						679	304	681	214												638	588	640
						690	51	692	122												653	591	642
						919	51	960	147												660	600	658
						954	267														665	601	660
																					666	603	666
	1810		625		4066		8965		6511		1676		2184		4559		3301				673	604	679
																					681	606	681
																					686	607	683
																					924	612	924
																					960	614	954
																					975	619	959
																						633
																						634
																						635
																						641
																						642
																						644
																						647
																						659
																						660
																						664
																						666
																						672
																						676
																						679
																						680
																						681
																						690
																						691
																						692
																						919
																						954
																						960

## Sheet: F-ARISA_evaluation
	Control	Control	Control	Biochar	Biochar	Biochar	Sludge	Sludge	Sludge
	1F	2F	3F	4F	5F	6F	7F	8F	9F					Control	Control	Control	Biochar	Biochar	Biochar	Sludge	Sludge	Sludge		Simpson
226	0	0	34	0	0	0	0	0	0	34				1F	2F	3F	4F	5F	6F	7F	8F	9F		Summary Statistics						Method: 95.0 percent LSD
388	0	0	34	84	48	0	0	30	0	196			Taxa_S	15	7	30	34	33	16	10	20	17			Count	Average	Standard deviation		P-value		Count	Mean	Homogeneous Groups
418	0	0	0	0	43	0	0	0	0	43			Individuals	1810	625	4066	8965	6511	1676	2184	4559	3301		control	3	0.859767	0.046519		0.2922	control	3	0.859767	X	a
422	34	0	0	0	0	0	0	0	180	214			Dominance_D	0.1387	0.1875	0.09449	0.08734	0.08937	0.1268	0.1524	0.1453	0.1203		BC	3	0.898833	0.0222239			SS	3	0.860667	X	a
423	0	0	84	0	0	0	0	0	0	84			Simpson_1-D	0.8613	0.8125	0.9055	0.9127	0.9106	0.8732	0.8476	0.8547	0.8797		SS	3	0.860667	0.0168613			BC	3	0.898833	X	a
434	0	0	0	49	0	0	0	0	0	49			Shannon_H	2.327	1.789	2.838	2.879	2.868	2.405	2.05	2.346	2.404
436	43	0	0	0	0	0	0	0	0	43			Evenness_e^H/S	0.683	0.8546	0.5692	0.5235	0.5336	0.6921	0.777	0.5224	0.6513		Shannon
437	0	0	45	82	58	0	0	54	0	239			Brillouin	2.303	1.761	2.816	2.867	2.853	2.378	2.037	2.333	2.389		Summary Statistics						Method: 95.0 percent LSD
439	0	0	0	0	57	0	0	0	0	57			Menhinick	0.3526	0.28	0.4705	0.3591	0.409	0.3908	0.214	0.2962	0.2959			Count	Average	Standard deviation		P-value		Count	Mean	Homogeneous Groups
450	0	32	0	0	0	0	0	0	0	32			Margalef	1.866	0.932	3.49	3.626	3.644	2.02	1.171	2.255	1.975		control	3	2.318	0.524558		0.3116	SS	3	2.26667	X	a
458	0	0	0	55	51	0	0	0	0	106			Equitability_J	0.8592	0.9192	0.8343	0.8165	0.8203	0.8673	0.8904	0.7832	0.8486		BC	3	2.71733	0.270545			control	3	2.318	X	a
485	0	0	0	38	0	0	0	0	0	38			Fisher_alpha	2.24	1.104	4.391	4.471	4.54	2.45	1.354	2.69	2.345		SS	3	2.26667	0.189867			BC	3	2.71733	X	a
494	0	0	0	0	0	0	0	101	56	157			Berger-Parker	0.2961	0.2864	0.2265	0.1884	0.1732	0.2691	0.2216	0.2963	0.2348
495	96	38	142	308	226	77	51	0	0	938			Chao-1	15	7	30	34	33	16	10	20	17		Evenness
517	0	0	0	0	0	0	0	0	453	453														Summary Statistics						Method: 95.0 percent LSD
518	0	0	171	458	195	0	113	112	0	1049						Simpson_1-D	Shannon_H	Evenness_e^H/S	Chao-1						Count	Average	Standard deviation		P-value		Count	Mean	Homogeneous Groups
519	0	0	0	0	0	81	0	0	0	81				control	1F	0.8613	2.327	0.683	15					control	3	0.702267	0.143672		0.5322	BC	3	0.583067	X	a
520	123	0	108	0	97	0	0	0	0	328				control	2F	0.8125	1.789	0.8546	7					BC	3	0.583067	0.0945606			SS	3	0.650233	X	a
524	0	0	0	0	0	0	0	0	227	227				control	3F	0.9055	2.838	0.5692	30					SS	3	0.650233	0.127303			control	3	0.702267	X	a
525	0	106	462	1066	922	207	206	350	0	3319				BC	4F	0.9127	2.879	0.5235	34
526	202	0	0	0	0	0	0	0	0	202				BC	5F	0.9106	2.868	0.5336	33					Chao-1
529	0	0	31	0	0	70	0	0	0	101				BC	6F	0.8732	2.405	0.6921	16					Summary Statistics						Method: 95.0 percent LSD
530	0	0	0	0	44	0	0	0	0	44				SS	7F	0.8476	2.05	0.777	10						Count	Average	Standard deviation		P-value		Count	Mean	Homogeneous Groups
534	0	0	39	72	38	0	0	0	0	149				SS	8F	0.8547	2.346	0.5224	20					control	3	17.3333	11.6762		0.3095	SS	3	15.6667	X	a
537	0	0	0	0	0	0	0	0	47	47				SS	9F	0.8797	2.404	0.6513	17					BC	3	27.6667	10.116			control	3	17.3333	X	a
538	40	0	62	201	32	0	0	0	0	335														SS	3	15.6667	5.1316			BC	3	27.6667	X	a
541	0	0	0	509	0	0	0	0	351	860
542	0	49	174	0	453	88	420	291	0	1475
543	77	0	0	0	0	0	0	0	0	77
545	0	0	0	67	0	0	0	0	0	67
546	0	0	0	204	0	0	0	0	0	204
547	0	0	67	0	0	0	0	0	0	67
548	0	0	0	0	0	0	0	0	53	53
549	0	0	86	0	0	49	0	0	0	135
550	0	0	0	167	163	0	0	48	0	378
551	73	0	0	0	0	0	0	0	0	73
552	0	0	0	0	69	0	0	0	0	69
554	0	0	0	0	0	0	0	0	45	45
555	0	0	45	109	0	0	0	112	0	266
556	0	0	0	0	81	0	0	0	0	81
560	0	0	0	47	0	0	0	0	0	47
565	0	0	49	89	140	0	0	0	0	278
567	55	0	0	0	0	0	0	0	0	55
577	0	0	0	89	0	0	0	0	0	89
578	0	0	0	0	78	0	0	43	0	121
579	0	0	0	158	0	40	0	0	0	198
580	0	0	75	0	113	0	0	38	0	226
583	69	0	0	0	0	0	0	0	0	69
588	0	0	0	0	0	31	0	0	0	31
591	0	0	0	48	0	0	0	0	0	48
596	0	0	0	0	0	0	0	0	86	86
597	0	0	0	0	0	0	0	584	0	584
598	0	0	0	0	0	0	92	0	0	92
600	0	0	57	132	0	0	0	0	0	189
601	0	0	0	0	60	0	0	0	0	60
602	0	0	0	0	0	0	0	0	190	190
603	0	0	0	1264	0	0	0	0	0	1264
604	0	0	490	0	990	236	0	320	0	2036
605	0	0	0	0	0	0	160	0	55	215
606	0	0	0	535	0	57	0	0	0	592
607	233	129	165	0	380	0	0	113	0	1020					226	388	418	422	423	434	436	437	439	450	458	485	494	495	517	518	519	520	524	525	526	529	530	534	537	538	541	542	543	545	546	547	548	549	550
612	0	0	0	76	0	0	0	0	0	76			Control	1F	0	0	0	34	0	0	43	0	0	0	0	0	0	96	0	0	0	123	0	0	202	0	0	0	0	40	0	0	77	0	0	0	0	0	0
614	0	0	0	0	40	0	0	0	0	40			Control	2F	0	0	0	0	0	0	0	0	0	32	0	0	0	38	0	0	0	0	0	106	0	0	0	0	0	0	0	49	0	0	0	0	0	0	0
619	0	0	170	415	172	80	0	0	459	1296			Control	3F	34	34	0	0	84	0	0	45	0	0	0	0	0	142	0	171	0	108	0	462	0	31	0	39	0	62	0	174	0	0	0	67	0	86	0
620	0	0	0	0	0	0	0	1351	0	1351			Biochar	4F	0	84	0	0	0	49	0	82	0	0	55	38	0	308	0	458	0	0	0	1066	0	0	0	72	0	201	509	0	0	67	204	0	0	0	167
622	0	0	0	0	0	0	484	0	0	484			Biochar	5F	0	48	43	0	0	0	0	58	57	0	51	0	0	226	0	195	0	97	0	922	0	0	44	38	0	32	0	453	0	0	0	0	0	0	163
624	30	0	0	0	0	0	0	0	0	30			Biochar	6F	0	0	0	0	0	0	0	0	0	0	0	0	0	77	0	0	81	0	0	207	0	70	0	0	0	0	0	88	0	0	0	0	0	49	0
632	0	0	0	0	0	0	0	0	775	775			Sludge	7F	0	0	0	0	0	0	0	0	0	0	0	0	0	51	0	113	0	0	0	206	0	0	0	0	0	0	0	420	0	0	0	0	0	0	0
633	0	0	0	1689	0	0	0	0	0	1689			Sludge	8F	0	30	0	0	0	0	0	54	0	0	0	0	101	0	0	112	0	0	0	350	0	0	0	0	0	0	0	291	0	0	0	0	0	0	48
634	0	0	921	0	0	451	0	680	0	2052			Sludge	9F	0	0	0	180	0	0	0	0	0	0	0	0	56	0	453	0	0	0	227	0	0	0	0	0	47	0	351	0	0	0	0	0	53	0	0
635	0	0	0	0	1128	0	0	0	0	1128
636	0	0	0	0	0	0	445	0	0	445				Variance-covariance matrix, Within grouping
638	536	179	0	0	0	0	0	0	0	715				PC	Eigenvalue	% variance			PC 1	PC 2	PC 3	PC 4	PC 5	Group	PC 6	PC 7	PC 8
640	0	0	0	0	0	0	0	0	113	113				1	577196	44.09		Kontrola	-0.18905	-0.83286	-0.77072	-0.7598	1.0796	1	3.5188	72412000000000	-1353400000000000
641	0	0	0	59	0	0	0	0	0	59				2	311457	23.791		Kontrola	-0.17863	-0.71518	-0.67673	-0.62385	0.48799	1	-0.43204	72412000000000	-1353400000000000
642	0	0	0	0	41	0	0	83	0	124				3	191313	14.614		Kontrola	-0.46404	0.55714	-0.25349	0.76452	-1.9632	1	2.0549	72412000000000	-1353400000000000
644	0	0	0	50	0	0	0	0	0	50				4	121924	9.3133		Biouhlie	2.7497	0.83562	1.5851	-0.0031123	-0.21495	2	-0.27115	-146650000000000	-867220000000000
647	0	0	0	0	89	0	0	0	0	89				5	94353.6	7.2073		Biouhlie	-0.92297	0.43326	3.0312	0.13	0.27246	2	-0.32682	-146650000000000	-867220000000000
653	0	0	30	0	0	0	0	0	0	30				6	12890.1	0.98463		Biouhlie	-0.29729	-0.19407	-0.72697	0.057396	-0.76846	2	-0.2799	-146650000000000	-867220000000000
658	0	0	0	0	0	0	0	0	33	33				7	1.09218e-26	8.3427e-31		Kal	-0.19528	-0.68738	-0.25026	-1.662	-0.81064	3	-1.315	74239000000000	2220600000000000
659	0	0	0	90	0	31	0	0	0	121				8	4.21676e-27	3.221e-31		Kal	-0.58604	1.9782	-1.367	0.13451	1.246	3	-1.5093	74239000000000	2220600000000000
660	0	0	106	0	79	0	0	76	0	261								Kal	0.083602	-1.3747	-0.57111	1.9623	0.6712	3	-1.4395	74239000000000	2220600000000000
664	0	0	0	82	0	0	0	0	0	82
665	58	0	0	0	0	0	0	0	0	58
666	0	0	47	0	91	0	0	34	0	172								control	-0.18905
672	0	0	0	0	0	39	0	0	0	39								control	-0.17863
673	0	0	42	0	0	0	0	0	0	42								control	-0.46404
676	0	0	0	0	50	0	0	0	0	50								control	-0.83286
679	0	0	0	304	0	0	0	0	63	367								control	-0.71518
680	0	0	0	0	0	103	0	0	0	103								control	0.55714
681	0	0	224	0	214	0	0	88	0	526								control	-0.77072
683	0	0	0	0	0	0	64	0	0	64								control	-0.67673
686	141	92	0	0	0	0	0	0	0	233								control	-0.25349
690	0	0	0	51	0	0	0	0	0	51								control	-0.7598
691	0	0	0	0	0	36	0	0	0	36								control	-0.62385
692	0	0	0	0	122	0	0	0	0	122								control	0.76452
919	0	0	0	51	0	0	0	0	0	51								control	1.0796
924	0	0	34	0	0	0	149	0	0	183								control	0.48799
954	0	0	0	267	0	0	0	0	115	382								control	-1.9632
959	0	0	0	0	0	0	0	51	0	51								BC	2.7497
960	0	0	40	0	147	0	0	0	0	187								BC	-0.92297
975	0	0	32	0	0	0	0	0	0	32								BC	-0.29729
	1810	625	4066	8965	6511	1676	2184	4559	3301									BC	0.83562
	1810	625	4066	8965	6511	1676	2184	4559	3301									BC	0.43326
																		BC	-0.19407
																		BC	1.5851
																		BC	3.0312
																		BC	-0.72697
																		BC	-0.0031123
																		BC	0.13
																		BC	0.057396
																		BC	-0.21495
																		BC	0.27246
																		BC	-0.76846
																		SS	-0.19528
																		SS	-0.58604
																		SS	0.083602
																		SS	-0.68738
																		SS	1.9782
																		SS	-1.3747
																		SS	-0.25026
																		SS	-1.367
																		SS	-0.57111
																		SS	-1.662
																		SS	0.13451
																		SS	1.9623
																		SS	-0.81064
																		SS	1.246
																		SS	0.6712
[truncated: 68 more columns]
