# Supplementary material for: Environmental risks and agronomic benefits of industrial sewage sludge-derived biochar
Source: PeerJ. 2024 Sep 25;12:e18184. doi: 10.7717/peerj.18184 (PMC11648124; doi:10.7717/peerj.18184)
Supplement: Table S1 [file peerj-12-18184-s001.xlsx]

## Sheet: pH
determination	BC	SS
1	7.71	7.32
2	7.69	7.33
3	7.73	7.34
average	7.71	7.33
SD	0.02	0.01

## Sheet: EC
determination (µS/cm)	BC	SS
1	1.07	2.34
2	1.06	2.35
3	1.05	2.36
average	1.06	2.35
SD	0.01	0.01

## Sheet: CEC
determination (cmol/kg)	BC	SS
1	55.65	122.59
2	58.34	116.93
3	53	116.47
average	55.6633	118.663
SD	2.67002	3.40836

## Sheet: Ctotal
determination (%)	BC	SS
1	38.56	31.45
2	38.62	31.57
3	38.5	31.51
average	38.56	31.51
SD	0.06	0.06

## Sheet: Cinorg
determination (%)	BC	SS
1	1.72	2.62
2	1.79	2.72
3	1.67	2.62
average	1.72667	2.65333
SD	0.0602771	0.057735

## Sheet: Corg
determination (%)	BC	SS	determination	BC	SS
1	38.56	31.45	1	1.72	2.62
2	38.62	31.57	2	1.79	2.72
3	38.5	31.51	3	1.67	2.62
average	38.56	31.51	average	1.72667	2.65333
SD	0.06	0.06	SD	0.0602771	0.057735
1	36.84	28.83
2	36.83	28.85
3	36.83	28.89
average	36.8333	28.8567
SD	0.0057735	0.0305505

## Sheet: Ntotal
determination (%)	BC	SS
1	6.54	2.62
2	6.49	2.72
3	6.55	2.62
average	6.52667	2.65333
SD	0.0321455	0.057735

## Sheet: Htotal
determination (%)	BC	SS
1	1.87	6.71
2	1.89	6.81
3	1.9	6.76
average	1.88667	6.76
SD	0.0152753	0.05

## Sheet: ash content
determination (%)	BC	SS
1	50.99	23.56
2	51.02	23.59
3	50.96	23.62
average	50.99	23.59
SD	0.03	0.03

## Sheet: elemental analysis
determination (mg/kg)	BC	SS
As	<LOD	<LOD	LOD=1,00
Cd	<LOD	<LOD	LOD=1,00
Cr	93	42
Cu	295	158
Ni	151	51
Pb	32	15
Zn	1656	593
Fe	135000	107000
Hg	<LOD	2.04	LOD=2,00
