# Supplementary material for: Environmental risks and agronomic benefits of industrial sewage sludge-derived biochar
Source: PeerJ. 2024 Sep 25;12:e18184. doi: 10.7717/peerj.18184 (PMC11648124; doi:10.7717/peerj.18184)
Supplement: Table S2 [file peerj-12-18184-s002.xlsx]

## Sheet: BC
PAHs (mg/kg)	Measurement 1	Measurement 2	Measurement 3
naphthalene	1.67	1.68	1.68
acenaphthylene	<LOD	<LOD	<LOD	LOD=0,10
1-methylnaphthalene	0.27	0.28	0.27
2-methylnaphthalene	0.65	0.64	0.64
acenaphthalene	<LOD	<LOD	<LOD	LOD=0,10
fluorene	<LOD	<LOD	<LOD	LOD=0,10
phenanthrene	0.17	0.16	0.16
anthracene	<LOD	<LOD	<LOD	LOD=0,10
fluoranthene	<LOD	<LOD	<LOD	LOD=0,10
pyrene	<LOD	<LOD	<LOD	LOD=0,10
benzo(a)anthracene	0.1	0.1	0.1
chrysene	0.26	0.27	0.26
benzo(b)fluoranthene	0.28	0.27	0.27
benzo(k)fluoranthene	<LOD	<LOD	<LOD	LOD=0,10
benzo(a)pyrene	<LOD	<LOD	<LOD	LOD=0,10
dibenzo(a,h)anthracene	<LOD	<LOD	<LOD	LOD=0,10
benzo(g,h,i)perylene	<LOD	<LOD	<LOD	LOD=0,10
ideno(1,2,3-c,d)pyrene	<LOD	<LOD	<LOD	LOD=0,10

## Sheet: SS
PAHs (mg/kg)	Measurement 1	Measurement 2	Measurement 3
naphthalene	1.82	1.82	1.83
acenaphthylene	<LOD	<LOD	<LOD	LOD=0,10
1-methylnaphthalene	0.28	0.28	0.3
2-methylnaphthalene	0.78	0.79	0.79
acenaphthalene	<LOD	<LOD	<LOD	LOD=0,10
fluorene	<LOD	<LOD	<LOD	LOD=0,10
phenanthrene	0.26	0.25	0.26
anthracene	<LOD	<LOD	<LOD	LOD=0,10
fluoranthene	<LOD	<LOD	<LOD	LOD=0,10
pyrene	0.15	0.16	0.16
benzo(a)anthracene	0.2	0.21	0.21
chrysene	0.49	0.49	0.51
benzo(b)fluoranthene	0.01	0.01	0.01
benzo(k)fluoranthene	<LOD	<LOD	<LOD	LOD=0,10
benzo(a)pyrene	<LOD	<LOD	<LOD	LOD=0,10
dibenzo(a,h)anthracene	<LOD	<LOD	<LOD	LOD=0,10
benzo(g,h,i)perylene	<LOD	<LOD	<LOD	LOD=0,10
ideno(1,2,3-c,d)pyrene	<LOD	<LOD	<LOD	LOD=0,10
